# Supplementary material
Source: bioRxiv or medRxiv preprint supplement (http://medrxiv.stage.highwire.org/highwire/filestream/91892/field_highwire_adjunct_files/9/2020.07.31.20165654-5.pdf)
Supplement: Supplementary file [file 2020.07.31.20165654-5.pdf]

**Supplemental Table 5.** Face mask requirements put in place at the state level in the United States.

| US State                | Intensity <sup>1</sup> | Start Date<br>(2020) <sup>2</sup> | End Date<br>(2020) <sup>2</sup>         | Duration<br>(Days) <sup>3</sup> | Cases at<br>Start <sup>4</sup> |
|-------------------------|------------------------|-----------------------------------|-----------------------------------------|---------------------------------|--------------------------------|
| Alabama                 | 0                      | April 30 <sup>th</sup>            | July 31 <sup>st</sup>                   | 92                              | 6,925                          |
| Alaska                  | 0                      | April 3 <sup>rd</sup>             | <i>July 1<sup>st</sup></i> <sup>5</sup> | 89                              | 146                            |
| Arizona                 | 0                      | June 18 <sup>th</sup>             | <i>July 1<sup>st</sup></i>              | 13                              | 41,159                         |
| Arkansas                | 0                      | April 23 <sup>rd</sup>            | <i>July 1<sup>st</sup></i>              | 69                              | 2,392                          |
| California              | 0                      | March 19 <sup>th</sup>            | <i>July 1<sup>st</sup></i>              | 104                             | 893                            |
| Colorado                | 0                      | April 26 <sup>th</sup>            | July 30 <sup>th</sup>                   | 95                              | 12,967                         |
| Connecticut             | 1                      | April 20 <sup>th</sup>            | <i>July 1<sup>st</sup></i>              | 72                              | 17,962                         |
| Delaware                | 1                      | April 28 <sup>th</sup>            | <i>July 1<sup>st</sup></i>              | 64                              | 4,162                          |
| District of<br>Columbia | 1                      | April 17 <sup>th</sup>            | July 25 <sup>th</sup>                   | 99                              | 2350                           |
| Florida                 | 0                      | June 20 <sup>th</sup>             | <i>July 1<sup>st</sup></i>              | 11                              | 89,740                         |
| Georgia                 | 0                      | May 1 <sup>st</sup>               | July 16 <sup>th</sup>                   | 76                              | 25,431                         |
| Hawaii                  | 0                      | April 16 <sup>th</sup>            | August 1 <sup>st</sup>                  | 107                             | 524                            |
| Idaho                   | 0                      | April 6 <sup>th</sup>             | <i>July 1<sup>st</sup></i>              | 86                              | 1,100                          |
| Illinois                | 1                      | April 30 <sup>th</sup>            | May 29 <sup>th</sup>                    | 29                              | 50,355                         |
| Indiana                 | 0                      | May 22 <sup>nd</sup>              | July 18 <sup>th</sup>                   | 57                              | 30,673                         |
| Iowa <sup>6</sup>       | -                      | -                                 | -                                       | -                               | -                              |
| Kansas                  | 0                      | April 30 <sup>th</sup>            | June 8 <sup>th</sup>                    | 39                              | 3,811                          |
| Kentucky                | 0                      | April 4 <sup>th</sup>             | <i>July 1<sup>st</sup></i>              | 88                              | 762                            |
| Louisiana               | 0                      | April 27 <sup>th</sup>            | July 24 <sup>th</sup>                   | 88                              | 26,832                         |
| Maine                   | 1                      | May 1 <sup>st</sup>               | <i>July 1<sup>st</sup></i>              | 61                              | 1,095                          |
| Massachusetts           | 1                      | May 6 <sup>th</sup>               | <i>July 1<sup>st</sup></i>              | 56                              | 70,271                         |

| US State                    | Intensity <sup>1</sup> | Start Date<br>(2020) <sup>2</sup> | End Date<br>(2020) <sup>2</sup> | Duration<br>(Days) <sup>3</sup> | Cases at<br>Start <sup>4</sup> |
|-----------------------------|------------------------|-----------------------------------|---------------------------------|---------------------------------|--------------------------------|
| Michigan                    | 1                      | April 27 <sup>th</sup>            | <i>July 1<sup>st</sup></i>      | 65                              | 38,003                         |
| Minnesota                   | 0                      | May 4 <sup>th</sup>               | <i>July 1<sup>st</sup></i>      | 58                              | 6,663                          |
| Mississippi <sup>6</sup>    | -                      | -                                 | -                               | -                               | -                              |
| Missouri                    | 0                      | April 7 <sup>th</sup>             | <i>July 1<sup>st</sup></i>      | 85                              | 2,722                          |
| Montana <sup>6</sup>        | -                      | -                                 | -                               | -                               | -                              |
| Nebraska <sup>6</sup>       | -                      | -                                 | -                               | -                               | -                              |
| Nevada                      | 0                      | May 9 <sup>th</sup>               | July 1 <sup>st</sup>            | 53                              | 5,942                          |
| New Hampshire <sup>6</sup>  | -                      | -                                 | -                               | -                               | -                              |
| New Jersey                  | 1                      | April 13 <sup>th</sup>            | <i>July 1<sup>st</sup></i>      | 79                              | 61,850                         |
| New Mexico                  | 1                      | May 15 <sup>th</sup>              | July 15 <sup>th</sup>           | 61                              | 5,503                          |
| New York                    | 1                      | April 17 <sup>th</sup>            | July 14 <sup>th</sup>           | 88                              | 225,761                        |
| North Carolina              | 0                      | May 8 <sup>th</sup>               | June 26 <sup>th</sup>           | 49                              | 13,431                         |
| North Dakota <sup>6</sup>   | -                      | -                                 | -                               | -                               | -                              |
| Ohio                        | 0                      | April 4 <sup>th</sup>             | <i>July 1<sup>st</sup></i>      | 88                              | 3,312                          |
| Oklahoma <sup>6</sup>       | -                      | -                                 | -                               | -                               | -                              |
| Oregon                      | 1                      | July 1 <sup>st</sup>              | <i>July 1<sup>st</sup></i>      | 0                               | 8,663                          |
| Pennsylvania                | 1                      | April 19 <sup>th</sup>            | <i>July 1<sup>st</sup></i>      | 73                              | 31,742                         |
| Rhode Island                | 1                      | May 8 <sup>th</sup>               | July 4 <sup>th</sup>            | 57                              | 10,530                         |
| South Carolina <sup>6</sup> | -                      | -                                 | -                               | -                               | -                              |
| South Dakota <sup>6</sup>   | -                      | -                                 | -                               | -                               | -                              |
| Texas                       | 0                      | May 5 <sup>th</sup>               | <i>July 1<sup>st</sup></i>      | 57                              | 33,134                         |
| Utah                        | 0                      | April 10 <sup>th</sup>            | July 11 <sup>th</sup>           | 92                              | 1,980                          |
| Vermont                     | 0                      | April 20 <sup>th</sup>            | July 15 <sup>th</sup>           | 86                              | 812                            |

| US State      | Intensity <sup>1</sup> | Start Date<br>(2020) <sup>2</sup> | End Date<br>(2020) <sup>2</sup> | Duration<br>(Days) <sup>3</sup> | Cases at<br>Start <sup>4</sup> |
|---------------|------------------------|-----------------------------------|---------------------------------|---------------------------------|--------------------------------|
| Virginia      | 1                      | May 26 <sup>th</sup>              | <i>July 1<sup>st</sup></i>      | 36                              | 37,727                         |
| Washington    | 0                      | May 4 <sup>th</sup>               | <i>July 1<sup>st</sup></i>      | 58                              | 15,943                         |
| West Virginia | 0                      | June 29 <sup>th</sup>             | <i>July 1<sup>st</sup></i>      | 2                               | 2,831                          |
| Wisconsin     | 0                      | May 28 <sup>th</sup>              | <i>July 1<sup>st</sup></i>      | 34                              | 16,565                         |
| Wyoming       | 0                      | April 6 <sup>th</sup>             | <i>July 1<sup>st</sup></i>      | 86                              | 300                            |

<sup>1</sup>The intensity at which this intervention was implemented by the state is denoted by (1) Mandate or (0) Recommendation (NYC, 2020).

<sup>2</sup>Start and end dates intervention implementation (NYC, 2020).

<sup>3</sup>The number of days the intervention was implemented from start to end dates.

<sup>4</sup>The cumulative number of cases in the respective state at the time the intervention was implemented.

<sup>5</sup> Italicized July 1<sup>st</sup> dates represent an arbitrary end date chosen as a data cutoff point for this study.

<sup>6</sup>Nine states, Iowa, Mississippi, Montana, Nebraska, New Hampshire, North Dakota, Oklahoma, South Carolina, and South Dakota, did not implement face mask interventions.

## References

NYC (2020). *COVID-19: Data* [Online]. New York City Health. Available: <https://www1.nyc.gov/site/doh/covid/covid-19-data-archive.page> [Accessed July 20, 2020].
